# Supplementary material for: Measuring dynamic social contacts in a rehabilitation hospital: effect of wards, patient and staff characteristics
Source: PubMed Central journal article supplement (PMC5786108; doi:10.1038/s41598-018-20008-w), 2018-01-26
Supplement: 41598_2018_20008_MOESM1_ESM.pdf [file 41598_2018_20008_MOESM1_ESM.pdf]

1 **Measuring dynamic social contacts in a rehabilitation hospital: effect of**  
2 **wards, patient and staff characteristics.**

3

4 Audrey Duval\*<sup>1</sup>, Thomas Obadia<sup>2, 3</sup>, Lucie Martinet<sup>4</sup>, Pierre-Yves Boëlle<sup>5</sup>, Eric Fleury<sup>6</sup>, Didier  
5 Guillemot\*\*<sup>7, 8, 9</sup>, Lulla Opatowski\*\*<sup>1</sup>, Laura Temime\*\*<sup>10, 11</sup>, on behalf of I-Bird study group

6 \*\* Equally contributed

7

8 Correspondence to [lulla.opatowski@pasteur.fr](mailto:lulla.opatowski@pasteur.fr)

9

10 1 Biostatistics, Biomathematics, Pharmacoepidemiology and Infectious Diseases (B2PHI), Inserm,  
11 UVSQ, Institut Pasteur, Université Paris-Saclay, France

12 2 Institut Pasteur – Bioinformatics and Biostatistics Hub – C3BI, USR 3756 IP CNRS – Paris, France

13 3 Malaria Parasites & Hosts Unit, Department of Parasites & Insect Vectors, Institut Pasteur, Paris,  
14 France

15 4 ENS de Lyon, DANTE/INRIA, LIP UMR CNRS 5668 Université de Lyon, Lyon, France

16 5 Sorbonne Universités, UPMC Univ Paris 06, UMR\_S 1136, Institut Pierre Louis d'Epidémiologie et  
17 de Santé Publique, Paris, France

18 6 ENS de Lyon, Université de Lyon, Laboratoire de l'Informatique du Parallélisme (UMR CNRS 5668-  
19 ENS de Lyon-UCB Lyon 1), IXXI Rhône Alpes Complex Systems Institute, Lyon, France

20 7 INSERM 1181 Biostatistics, Biomathematics, Pharmacoepidemiology and Infectious Diseases  
21 (B2PHI), Institut Pasteur, B2PHI, Paris, France

22 8 Université de Versailles Saint-Quentin, UMR 1181, B2PHI, Montigny-Le-Bretonneux, France

23 9 AP-HP, Raymond-Poincaré Hospital, Garche, France

24 10 Laboratoire MESuRS, Conservatoire national des Arts et Métiers, Paris, France

25 11 Unité PACRI, Institut Pasteur, Conservatoire national des Arts et Métiers, Paris, France

26

27 **Supplementary material**

28 **Supplementary Table S1: mean (sd) of the number of daily distinct CPIs and the daily cumulative**  
 29 **CPI duration in minutes among patients**

|                            |                | <b>CPIs frequency</b> | <b>CPIs duration</b>       |
|----------------------------|----------------|-----------------------|----------------------------|
|                            |                | <b>mean (sd)</b>      | <b>(minutes) mean (sd)</b> |
| ward                       | W1             | 12.74 ( 4.56 )        | 32.58 ( 18.68 )            |
|                            | W2             | 10.93 ( 5.04 )        | 30.27 ( 20.12 )            |
|                            | W3             | 12.9 ( 7.34 )         | 20.9 ( 19.02 )             |
|                            | W4             | 11.14 ( 5.9 )         | 32.26 ( 19.95 )            |
|                            | W5             | 8.58 ( 5.13 )         | 47.16 ( 33.67 )            |
| Reason for hospitalization | Neurology      | 11.85 ( 4.94 )        | 31.36 ( 19.08 )            |
|                            | Orthopedic     | 10.73 ( 5.46 )        | 26.11 ( 19.29 )            |
|                            | Nutrition      | 12.89 ( 7.59 )        | 22.56 ( 21.71 )            |
|                            | Post-operative | 14.71 ( 9.16 )        | 34.53 ( 16.39 )            |
|                            | Geriatric      | 8.62 ( 5.16 )         | 47.19 ( 33.92 )            |

30

31 **Supplementary Table S2: mean (sd) of the number of daily distinct CPIs and the daily cumulative**  
 32 **CPI duration in minutes among hospital staff**

|                |                   | <b>CPIs frequency</b> | <b>CPIs duration</b>       |
|----------------|-------------------|-----------------------|----------------------------|
|                |                   | <b>mean (sd)</b>      | <b>(minutes) mean (sd)</b> |
| Hospital staff | Hospital porter   | 24.58 ( 13.4 )        | 8.96 ( 4.41 )              |
|                | Physician         | 21.32 ( 7.02 )        | 13.2 ( 6.76 )              |
|                | HCW               | 14.29 ( 5.29 )        | 14.94 ( 8.28 )             |
|                | Reeducation staff | 15.03 ( 6.04 )        | 11.6 ( 9.62 )              |
|                | AHS               | 12 ( 6.22 )           | 15.71 ( 9.52 )             |
|                | Logistic          | 7.23 ( 3.86 )         | 8.07 ( 9.43 )              |
| ward           | W1                | 15.34 ( 6.07 )        | 14.7 ( 9.64 )              |
|                | W2                | 16.81 ( 6.81 )        | 17.21 ( 6.13 )             |
|                | W3                | 14.6 ( 3.31 )         | 15.1 ( 7.54 )              |
|                | W4                | 14.91 ( 4.47 )        | 12.84 ( 3.72 )             |
|                | W5                | 10.98 ( 3.97 )        | 18.8 ( 11.85 )             |
|                | Transversal staff | 12.73 ( 7.18 )        | 11.67 ( 15.57 )            |

33

34 **Supplementary Text S1: Calculation of individual-specific and category-specific daily distinct**  
 35 **CPIs and cumulative duration of CPIs**

36 The *number of daily distinct CPIs* (DDC) for individual  $i$  on day  $t$  was calculated according to the  
 37 following formula:

38 
$$(1) DDC(i, t) = \sum_{j \in H(t)} I(i, j, t)$$

39 Where  $t$  is a day of presence of individual  $i$  in the hospital, and  $H(t)$  is the ensemble of all individuals  
 40 present in the hospital on day  $t$  and  $I(i, j, t)$  is defined by:

41 
$$I(i, j, t) = \begin{cases} 0, & \text{if no CPI recorded between } i \text{ and } j \text{ on day } t \\ 1, & \text{if at least one recorded CPI between } i \text{ and } j \text{ on day } t \end{cases}$$

42 The *daily cumulative duration of CPIs* of two individuals  $i$  and  $j$  on day  $t$  is noted  $DCD(i, j, t)$  and is  
43 calculated as the sum of all CPI durations shared by  $i$  and  $j$  on day  $t$ .

44 The *number of category-specific daily distinct CPIs* (cDDC) depicted in Fig. 2A was calculated  
45 according to the following formula:

46 
$$(2) \forall c, cDDC(c) = \frac{1}{N_c} \sum_{i \in c} \frac{1}{D_i} \sum_{t=1}^{D_i} DDC(i, t)$$

47 Where  $c$  is the category (eg. HCW, patients, etc.),  $N_c$  is the number of individuals  $i$  belonging to category  
48  $c$ ,  $D_i$  the number of days of presence of individual  $i$  in the hospital and  $DDC(i, t)$ , the number of daily  
49 distinct CPIs on day  $t$  for individual  $i$ .

50 The *category-specific cumulative duration of CPIs* (cDCD) depicted in Fig. 2B was calculated as  
51 follows:

52 
$$(3) \forall c, cDCD(c) = \frac{1}{N_c} \sum_{i \in c} \frac{1}{D_i} \sum_{t=1}^{D_i} \sum_{j \in H(t)} DCD(i, j, t)$$

53

54 Where  $c$  is the category (eg. HCW, patients, etc.),  $N_c$  is the number of individuals  $i$  belonging to  
55 category  $c$ ,  $D_i$  the number of days of presence of individual  $i$  in the hospital,  $H(t)$  is the ensemble of  
56 all individuals present in the hospital on day  $t$ , and  $DCD(i, j, t)$  the cumulative duration of CPIs on  
57 day  $t$  between individuals  $i$  and  $j$ .

58

59

## 60 **Supplementary Text S2: Calculation of contact frequency and contact duration matrices**

61 For each ward  $w$ , the contact matrix depicts the CPI frequency for all individuals of the ward according  
62 to their category. The values depicted in Fig. 3 are calculated as follows:

63 
$$(4) \forall (w, c_1, c_2), wDDC(c_1, c_2) = \frac{1}{N_{w,c_1}} \sum_{i=1}^{N_{w,c_1}} \frac{1}{D_i} \sum_{t=1}^{D_i} \sum_{j=1}^{N_{c_2}} I(i, j, t)$$

64 Where  $c_1$  and  $c_2$  are two categories,  $w$  is the ward number,  $N_{w,c_1}$  is the number of individuals  $s$   
65 belonging to category  $c_1$  (staff categories or patients), an  $D_i$  is the number of days of presence of  
66 individual  $i$  in the hospital,  $N_{c_2}$  is the number of individuals from category  $c_2$  in the hospital, and  
67  $I(i, j, t)$  equals 1 if at least one contact was recorded between  $i$  and  $j$  on day  $t$  and 0 otherwise.

68 For each ward  $w$ , the contact duration for a given category and a given ward depicted in Fig. 4 was  
69 calculated:

70

71 
$$(5) \forall (w, c_1, c_2), wDCD(c_1, c_2) = \frac{1}{N_{w,c_1}} \sum_{i=1}^{N_{w,c_1}} \frac{1}{D_i} \sum_{t=1}^{D_i} \sum_{j=1}^{N_{c_2}} DCD(i, j, t)$$

72

73 Where  $c_1$  and  $c_2$  are two categories,  $w$  is the ward number,  $N_{w,c_1}$  is the number of individuals  $s$   
74 belonging to category  $c_1$  (staff categories or patients), an  $D_i$  is the number of days of presence of

75 individual  $i$  in the hospital,  $N_{c2}$  is the number of individuals from category  $c_2$  in the hospital, and  
 76  $DCD(i,j,t)$  is the *daily cumulative duration of CPIs* of two individuals  $i$  and  $j$  on day  $t$ .

77

78 **Supplementary Text S3: Calculation of the threshold used for the GLMM**

79 
$$(6) M_w = \frac{1}{N} \sum_{p=1}^N \frac{1}{Nd_p} \sum_{k=1}^{Nd_p} C_k^p$$

80 Where  $N$  individuals included in the study.  $Nd_p$  the number of days for which contacts were recorded  
 81 for individual present (indicator or presence in the hospital),  $C_k^p$  is the number of distinct CPI (or  
 82 cumulative duration with other individual) recorded for individual  $p$  on day  $k$ .

83

84 **Supplementary Text S4: description of the generalized linear mixed-effects models (GLMM)**  
 85 **equations**

86 The GLMM model of the high daily contact frequency and high daily cumulative duration among  
 87 hospital staff was calculated:

88 
$$(7) Y_{among\ hospital\ staff} = (\beta_0 + \beta_{ward}) + \beta_1 Category + \beta_2 days\ of\ week$$

89 Where  $Y_{among\ hospital\ staff}$  represent the high daily contact frequency or the high daily cumulative  
 90 duration.  $\beta_{ward}$  represents the ward specific random intercepts,  $\beta_1$  and  $\beta_2$  the fixed effect of the  
 91 category and days of week as follows.

92 The GLMM model of the high daily contact frequency and high daily cumulative duration among patient  
 93 was calculated as:

94 
$$(8) Y_{among\ patient} = (\beta_0 + \beta_{ward}) + \beta_1 Reasons\ for\ hospitalization + \beta_2 Age +$$
  
 95 
$$\beta_3 Gender + \beta_4 days\ of\ week$$

96 Where  $Y_{among\ patient}$  represent the high daily contact frequency or the high daily cumulative duration.  
 97  $\beta_{ward}$  represents the ward specific random intercepts and  $\beta_1, \beta_2, \beta_3$  and  $\beta_4$  the fixed effect of the  
 98 reasons for hospitalization, age, gender and days of week.

99

100 **Supplementary Table S3: sensitivity analysis of the generalized linear mixed-effects models with**  
 101 **different thresholds (mean, mean + 1 standard deviation (SD), mean + 2 SD and mean + 3SD).**

102 Factors associated with high daily distinct CPI frequency and high daily cumulative duration of CPIs  
 103 among hospital staff or patients, resulting from a mixed model with ward-specific random intercepts to  
 104 account for within-ward and between-ward variations.

105

|                                                                            | <i>Factor</i>              | <i>level</i>       | <i>OR</i> | <i>CI 95%</i>          | <i>p-value</i> |
|----------------------------------------------------------------------------|----------------------------|--------------------|-----------|------------------------|----------------|
| High daily distinct CPI frequency among hospital staff<br>(mean threshold) | Category<br>(ref :HC<br>W) | AHS                | 0.40      | ( 0.32 - 0.50 )<br>*** | 9,00E-<br>39   |
|                                                                            |                            | Hospital<br>porter | 4.54      | ( 2.85 - 7.22 )<br>*** |                |
|                                                                            |                            | Logistic           | 0.23      | ( 0.15 - 0.37 )<br>*** |                |

|                                                                                 |                                                                    |                       |      |                        |               |
|---------------------------------------------------------------------------------|--------------------------------------------------------------------|-----------------------|------|------------------------|---------------|
|                                                                                 |                                                                    | Physician             | 1.32 | ( 0.66 - 2.64 )        |               |
|                                                                                 |                                                                    | Reeducati<br>on staff | 0.81 | ( 0.66 - 1.00 )        |               |
|                                                                                 |                                                                    | Monday                | 0.91 | ( 0.75 - 1.10 )        | 1.20E-<br>08  |
|                                                                                 | days of<br>week<br>(ref:<br>Wednes<br>day)                         | Tuesday               | 0.94 | ( 0.77 - 1.15 )        |               |
|                                                                                 |                                                                    | Thursday              | 1.15 | ( 0.94 - 1.41 )        |               |
|                                                                                 |                                                                    | Friday                | 1.00 | ( 0.82 - 1.22 )        |               |
|                                                                                 |                                                                    | Saturday              | 0.83 | ( 0.66 - 1.05 )        |               |
|                                                                                 |                                                                    | Sunday                | 0.53 | ( 0.42 - 0.67 )<br>*** |               |
|                                                                                 |                                                                    | AHS                   | 1.25 | ( 1.01 - 1.54 )<br>*   | 1.40E-<br>06  |
|                                                                                 | Category<br>(ref :HC<br>W)                                         | Hospital<br>porter    | 0.60 | ( 0.33 - 1.10 )        |               |
|                                                                                 |                                                                    | Logistic              | 0.59 | ( 0.33 - 1.05 )        |               |
|                                                                                 |                                                                    | Physician             | 0.20 | ( 0.06 - 0.68 )<br>**  |               |
|                                                                                 |                                                                    | Reeducati<br>on staff | 0.52 | ( 0.38 - 0.71 )<br>*** |               |
| High daily cumulative duration of CPIs among hospital<br>staff (mean threshold) |                                                                    | Monday                | 1.03 | ( 0.82 - 1.30 )        | 0.4           |
|                                                                                 | days of<br>week<br>(ref:<br>Wednes<br>day)                         | Tuesday               | 1.09 | ( 0.85 - 1.38 )        |               |
|                                                                                 |                                                                    | Thursday              | 1.18 | ( 0.92 - 1.50 )        |               |
|                                                                                 |                                                                    | Friday                | 1.15 | ( 0.91 - 1.45 )        |               |
|                                                                                 |                                                                    | Saturday              | 1.07 | ( 0.81 - 1.40 )        |               |
|                                                                                 |                                                                    | Sunday                | 1.32 | ( 1.02 - 1.71 )<br>*   |               |
|                                                                                 | Reasons<br>for<br>hospitali<br>zation<br>(ref:<br>Orthopa<br>edic) | Geriatric             | 5.62 | ( 0.78 - 40.48<br>)    | 0.012         |
|                                                                                 |                                                                    | Neurology             | 0.86 | ( 0.68 - 1.08 )        |               |
|                                                                                 |                                                                    | Nutrition             | 0.74 | ( 0.57 - 0.95 )<br>*   |               |
|                                                                                 |                                                                    | Post-<br>operative    | 0.92 | ( 0.69 - 1.22 )        |               |
|                                                                                 |                                                                    | [18,30)               | 1.75 | ( 1.22 - 2.50 )<br>**  | 0.0004<br>3   |
|                                                                                 |                                                                    | [30,40)               | 1.25 | ( 1.04 - 1.51 )<br>*   |               |
| High daily distinct CPI frequency among patients (mean<br>threshold)            | Age (ref:<br>[50,60) )                                             | [40,50)               | 0.91 | ( 0.77 - 1.07 )        |               |
|                                                                                 |                                                                    | [60,70)               | 1.09 | ( 0.92 - 1.28 )        |               |
|                                                                                 |                                                                    | [70+]                 | 1.25 | ( 1.03 - 1.52 )<br>*   |               |
|                                                                                 | Gender<br>(ref:<br>Female)                                         | Male                  | 0.76 | ( 0.68 - 0.85 )<br>*** | 1.80E-<br>06  |
|                                                                                 | days of<br>week<br>(ref:<br>Tuesday)                               | Monday                | 1.07 | ( 0.89 - 1.27 )        | 9,00E-<br>164 |
|                                                                                 |                                                                    | Tuesday               | 0.71 | ( 0.59 - 0.86 )<br>*** |               |

|  |                                                                    |                       |       |                         |              |
|--|--------------------------------------------------------------------|-----------------------|-------|-------------------------|--------------|
|  | Wednes<br>day)                                                     | Thursday              | 1.08  | ( 0.90 - 1.29 )         |              |
|  |                                                                    | Friday                | 1.67  | ( 0.98 - 1.39 )         |              |
|  |                                                                    | Saturday              | 0.20  | ( 0.16 - 0.25 )<br>***  |              |
|  |                                                                    | Sunday                | 0.15  | ( 0.12 - 0.19 )<br>***  |              |
|  | Reasons<br>for<br>hospitali<br>zation<br>(ref:<br>Orthopa<br>edic) | Geriatric             | 1.20  | ( 0.59 - 2.46 )         | 0.0079       |
|  |                                                                    | Neurology             | 1.42  | ( 1.13 - 1.78 )<br>**   |              |
|  |                                                                    | Nutrition             | 0.69  | ( 0.45 - 1.07 )         |              |
|  |                                                                    | Post-<br>operative    | 1.06  | ( 0.81 - 1.38 )         |              |
|  |                                                                    | [18,30)               | 0.70  | ( 0.48 - 1.01 )         | 2.60E-<br>07 |
|  | Age (ref:<br>[50,60) )                                             | [30,40)               | 0.97  | ( 0.80 - 1.17 )         |              |
|  |                                                                    | [40,50)               | 1.13  | ( 0.95 - 1.33 )         |              |
|  |                                                                    | [60,70)               | 1.00  | ( 0.84 - 1.20 )         |              |
|  |                                                                    | [70+]                 | 0.58  | ( 0.47 - 0.71 )<br>***  |              |
|  | Gender<br>(ref:<br>Female)                                         | Male                  | 1.07  | ( 0.96 - 1.20 )         | 0.2          |
|  |                                                                    | Monday                | 1.13  | ( 0.93 - 1.37 )         | 4.20E-<br>33 |
|  | days of<br>week<br>(ref:<br>Wednes<br>day)                         | Tuesday               | 1.16  | ( 0.95 - 1.41 )         |              |
|  |                                                                    | Thursday              | 1.15  | ( 0.94 - 1.40 )         |              |
|  |                                                                    | Friday                | 1.20  | ( 0.98 - 1.45 )         |              |
|  |                                                                    | Saturday              | 1.98  | ( 1.63 - 2.41 )<br>***  |              |
|  |                                                                    | Sunday                | 2.59  | ( 2.14 - 3.13 )<br>***  |              |
|  |                                                                    | AHS                   | 0.63  | ( 0.46 - 0.88 )<br>**   | 1.10E-<br>32 |
|  | Category<br>(ref :HC<br>W)                                         | Hospital<br>porter    | 10.81 | ( 7.15 - 16.36 )<br>*** |              |
|  |                                                                    | Logistic              | 0.51  | ( 0.25 - 1.03 )         |              |
|  |                                                                    | Physician             | 2.99  | ( 1.47 - 6.09 )<br>**   |              |
|  |                                                                    | Reeducati<br>on staff | 1.24  | ( 0.92 - 1.68 )         |              |
|  |                                                                    | Monday                | 0.86  | ( 0.66 - 1.13 )         | 2.30E-<br>17 |
|  | days of<br>week<br>(ref:<br>Wednes<br>day)                         | Tuesday               | 1.00  | ( 0.75 - 1.32 )         |              |
|  |                                                                    | Thursday              | 1.38  | ( 1.06 - 1.82 )<br>*    |              |
|  |                                                                    | Friday                | 1.35  | ( 1.04 - 1.75 )<br>*    |              |
|  |                                                                    | Saturday              | 0.65  | ( 0.45 - 0.93 )<br>*    |              |
|  |                                                                    | Sunday                | 0.25  | ( 0.16 - 0.40 )<br>***  |              |

High daily cumulative duration of CPIs among patients  
(mean threshold)

High daily distinct CPI frequency among hospital staff  
(mean plus one SD threshold)

|                                                                                          |                                                                                    |                                                   |                        |                        |                 |
|------------------------------------------------------------------------------------------|------------------------------------------------------------------------------------|---------------------------------------------------|------------------------|------------------------|-----------------|
| High daily cumulative duration of CPIs among hospital staff (mean plus one SD threshold) | AHS                                                                                | 1.07                                              | ( 0.80 - 1.42)         | 5.50E-05               |                 |
|                                                                                          | Category (ref :HC W)                                                               | Hospital porter                                   | 0.43                   | ( 0.16 - 1.20 )        |                 |
|                                                                                          |                                                                                    | Logistic                                          | 0.81                   | ( 0.38 - 1.72 )        |                 |
|                                                                                          |                                                                                    | Physician                                         | 0.00                   | ( 0.00 - 1.3e+46 )     |                 |
|                                                                                          |                                                                                    | Reeducation staff                                 | 0.37                   | ( 0.22 - 0.63 )<br>*** |                 |
|                                                                                          |                                                                                    | Monday                                            | 1.06                   | ( 0.77 - 1.46 )        | 0.00075         |
|                                                                                          | days of week (ref: Wednesday)                                                      | Tuesday                                           | 1.04                   | ( 0.75 - 1.46 )        |                 |
|                                                                                          |                                                                                    | Thursday                                          | 0.87                   | ( 0.61 - 1.24 )        |                 |
|                                                                                          |                                                                                    | Friday                                            | 1.14                   | ( 0.83 - 1.57 )        |                 |
|                                                                                          |                                                                                    | Saturday                                          | 1.03                   | ( 0.71 - 1.5 )         |                 |
| Sunday                                                                                   |                                                                                    | 1.88                                              | ( 1.35 - 2.61 )<br>*** |                        |                 |
| High daily distinct CPI frequency among patients (mean plus one SD threshold)            |                                                                                    | Reasons for hospitalization (ref: Orthopaedic)    | Geriatric              | 0.65                   | ( 0.22 - 1.95 ) |
|                                                                                          | Neurology                                                                          |                                                   | 0.87                   | ( 0.61 - 1.25 )        |                 |
|                                                                                          | Nutrition                                                                          |                                                   | 0.64                   | ( 0.46 - 0.88 )<br>**  |                 |
|                                                                                          | Post-operative                                                                     |                                                   | 1.77                   | ( 1.15 - 2.73 )<br>**  |                 |
|                                                                                          | Age (ref: [50,60) )                                                                | [18,30)                                           | 2.27                   | ( 1.41 - 3.66 )<br>*** | 6.30E-06        |
|                                                                                          |                                                                                    | [30,40)                                           | 1.70                   | ( 1.29 - 2.21 )<br>*** |                 |
|                                                                                          |                                                                                    | [40,50)                                           | 1.08                   | ( 0.83 - 1.39 )        |                 |
|                                                                                          |                                                                                    | [60,70)                                           | 1.30                   | ( 1.02 - 1.66 )<br>*   |                 |
|                                                                                          |                                                                                    | [70+]                                             | 0.80                   | ( 0.58 - 1.09 )        |                 |
|                                                                                          | High daily cumulative duration of CPIs among patients (mean plus one SD threshold) | Gender (ref: Female)                              | Male                   | 0.86                   | ( 0.73 - 1.02 ) |
| Monday                                                                                   |                                                                                    |                                                   | 0.82                   | ( 0.62 - 1.08 )        | 1.10E-66        |
| days of week (ref: Wednesday)                                                            |                                                                                    | Tuesday                                           | 0.74                   | ( 0.56 - 0.98 )<br>*   |                 |
|                                                                                          |                                                                                    | Thursday                                          | 1.47                   | ( 1.14 - 1.90 )<br>**  |                 |
|                                                                                          |                                                                                    | Friday                                            | 1.52                   | ( 1.19 - 1.96 )<br>*** |                 |
|                                                                                          |                                                                                    | Saturday                                          | 0.11                   | ( 0.06 - 0.19 )<br>*** |                 |
|                                                                                          |                                                                                    | Sunday                                            | 0.16                   | ( 0.10 - 0.26 )<br>*** |                 |
|                                                                                          |                                                                                    | Reasons for hospitalization (ref: Post-operative) | Geriatric              | 2.75                   | ( 0.87 - 8.75 ) |
| Neurology                                                                                | 1.31                                                                               |                                                   | ( 0.96 - 1.80 )        |                        |                 |
| Nutrition                                                                                | 0.64                                                                               |                                                   | ( 0.19 - 2.15 )        |                        |                 |
| Post-operative                                                                           | 0.91                                                                               |                                                   | ( 0.62 - 1.33 )        |                        |                 |

|                                                                                          |                               |                    |       |                          |          |
|------------------------------------------------------------------------------------------|-------------------------------|--------------------|-------|--------------------------|----------|
|                                                                                          | Orthopaedic)                  |                    |       |                          |          |
|                                                                                          |                               | [18,30)            | 1.04  | ( 0.62 - 1.75 )          | 8.70E-10 |
|                                                                                          |                               | [30,40)            | 1.27  | ( 0.97 - 1.66 )          |          |
|                                                                                          | Age (ref: [50,60) )           | [40,50)            | 1.18  | ( 0.93 - 1.51 )          |          |
|                                                                                          |                               | [60,70)            | 1.42  | ( 1.10 - 1.82 )<br>**    |          |
|                                                                                          |                               | [70+]              | 0.41  | ( 0.29 - 0.60 )<br>***   |          |
|                                                                                          | Gender (ref: Female)          | Male               | 1.31  | ( 1.12 - 1.54 )<br>***   | 0.00083  |
|                                                                                          |                               | Monday             | 0.92  | ( 0.68 - 1.26 )          | 1.30E-33 |
|                                                                                          | days of week (ref: Wednesday) | Tuesday            | 1.17  | ( 0.87 - 1.58 )          |          |
|                                                                                          |                               | Thursday           | 1.09  | ( 0.81 - 1.49 )          |          |
|                                                                                          |                               | Friday             | 1.11  | ( 0.82 - 1.50 )          |          |
|                                                                                          |                               | Saturday           | 2.01  | ( 1.52 - 2.7 )<br>***    |          |
|                                                                                          |                               | Sunday             | 3.39  | ( 2.60 - 4.41 )<br>***   |          |
|                                                                                          |                               | AHS                | 0.59  | ( 0.23 - 1.23 )          | 3.80E-29 |
|                                                                                          | Category (ref :HC W)          | Hospital porter    | 20.70 | ( 11.76 - 36.44 )<br>*** |          |
|                                                                                          |                               | Logistic           | 0.55  | ( 0.13 - 2.38 )          |          |
|                                                                                          |                               | Physician          | 8.74  | ( 3.75 - 20.37 )<br>***  |          |
|                                                                                          |                               | Reeducati on staff | 1.21  | ( 0.66 - 2.21 )          |          |
| High daily distinct CPI frequency among hospital staff (mean plus two SD threshold)      |                               | Monday             | 1.46  | ( 0.84 - 2.54 )          | 1,00E-15 |
|                                                                                          |                               | Tuesday            | 0.74  | ( 0.38 - 1.44 )          |          |
|                                                                                          | days of week (ref: Wednesday) | Thursday           | 2.30  | ( 1.33 - 3.97 )<br>**    |          |
|                                                                                          |                               | Friday             | 3.21  | ( 1.92 - 5.35 )<br>***   |          |
|                                                                                          |                               | Saturday           | 0.30  | ( 0.08 - 1.00 )          |          |
|                                                                                          |                               | Sunday             | 0.09  | ( 0.01 - 0.65 )<br>*     |          |
| High daily cumulative duration of CPIs among hospital staff (mean plus two SD threshold) |                               | AHS                | 0.95  | ( 0.62 - 1.45 )          | 2.80E-06 |
|                                                                                          | Category (ref :HC W)          | Hospital porter    | 0.18  | ( 0.02 - 1.33 )          |          |
|                                                                                          |                               | Logistic           | 1.02  | ( 0.43 - 2.44 )          |          |
|                                                                                          |                               | Physician          | 0.00  | ( 0.00 - Inf )           |          |
|                                                                                          |                               | Reeducati on staff | 0.09  | ( 0.02 - 0.35 )<br>***   |          |



|                                                                                    |                                                |                |      |                        |             |
|------------------------------------------------------------------------------------|------------------------------------------------|----------------|------|------------------------|-------------|
|                                                                                    |                                                | Monday         | 0.83 | ( 0.51 - 1.35 )        | 0.0006<br>3 |
|                                                                                    | days of week (ref: Wednesday)                  | Tuesday        | 1.07 | ( 0.66 - 1.74 )        |             |
|                                                                                    |                                                | Thursday       | 0.93 | ( 0.56 - 1.54 )        |             |
|                                                                                    |                                                | Friday         | 1.12 | ( 0.71 - 1.79 )        |             |
|                                                                                    |                                                | Saturday       | 1.33 | ( 0.80 - 2.21 )        |             |
|                                                                                    |                                                | Sunday         | 2.24 | ( 1.44 - 3.49 )<br>*** |             |
|                                                                                    | Reasons for hospitalization (ref: Orthopaedic) | Geriatric      | 0.65 | ( 0.29 - 1.47 )        | 0.047       |
|                                                                                    |                                                | Neurology      | 1.02 | ( 0.63 - 1.63 )        |             |
|                                                                                    |                                                | Nutrition      | 1.24 | ( 0.72 - 2.13 )        |             |
|                                                                                    |                                                | Post-operative | 2.33 | ( 1.27 - 4.25 )<br>**  |             |
|                                                                                    |                                                | [18,30)        | 2.10 | ( 1.04 - 4.25 )<br>*   | 0.074       |
|                                                                                    | Age (ref: [50,60) )                            | [30,40)        | 1.37 | ( 0.88 - 2.14 )        |             |
|                                                                                    |                                                | [40,50)        | 0.88 | ( 0.57 - 1.35 )        |             |
|                                                                                    |                                                | [60,70)        | 1.00 | ( 0.65 - 1.54 )        |             |
|                                                                                    |                                                | [70+]          | 0.68 | ( 0.39 - 1.19 )        |             |
| High daily distinct CPI frequency among patients (mean plus two SD threshold)      | Gender (ref: Female)                           | Male           | 0.86 | ( 0.64 - 1.15 )        | 0.31        |
|                                                                                    |                                                | Monday         | 1.22 | ( 0.69 - 2.13 )        | 2,00E-39    |
|                                                                                    | days of week (ref: Wednesday)                  | Tuesday        | 1.09 | ( 0.61 - 1.94 )        |             |
|                                                                                    |                                                | Thursday       | 3.28 | ( 2.02 - 5.31 )<br>*** |             |
|                                                                                    |                                                | Friday         | 3.14 | ( 1.94 - 5.08 )<br>*** |             |
|                                                                                    |                                                | Saturday       | 0.00 | ( 0.00 - Inf )         |             |
|                                                                                    |                                                | Sunday         | 0.04 | ( 0.01 - 0.31 )<br>**  |             |
|                                                                                    | Reasons for hospitalization (ref: Orthopaedic) | Geriatric      | 9.35 | ( 1.54 - 56.67 )<br>*  | 0.065       |
|                                                                                    |                                                | Neurology      | 0.89 | ( 0.51 - 1.55 )        |             |
|                                                                                    |                                                | Nutrition      | 0.25 | ( 0.04 - 1.57 )        |             |
|                                                                                    |                                                | Post-operative | 0.82 | ( 0.41 - 1.60 )        |             |
| High daily cumulative duration of CPIs among patients (mean plus two SD threshold) |                                                | [18,30)        | 0.81 | ( 0.28 - 2.30 )        | 6.30E-08    |
|                                                                                    |                                                | [30,40)        | 2.12 | ( 1.44 - 3.12 )<br>*** |             |
|                                                                                    | Age (ref: [50,60) )                            | [40,50)        | 1.16 | ( 0.78 - 1.74 )        |             |
|                                                                                    |                                                | [60,70)        | 1.57 | ( 1.07 - 2.29 )<br>*   |             |
|                                                                                    |                                                | [70+]          | 0.38 | ( 0.21 - 0.69 )<br>**  |             |

|                                                                                            |                                            |                       |       |                         |          |
|--------------------------------------------------------------------------------------------|--------------------------------------------|-----------------------|-------|-------------------------|----------|
|                                                                                            | Gender<br>(ref:<br>Female)                 | Male                  | 1.47  | ( 1.14 - 1.88 )<br>**   | 0.0026   |
|                                                                                            |                                            | Monday                | 1.09  | ( 0.65 - 1.85 )         | 3.70E-15 |
|                                                                                            | days of<br>week<br>(ref:<br>Wednes<br>day) | Tuesday               | 1.66  | ( 1.02 - 2.70 )<br>*    |          |
|                                                                                            |                                            | Thursday              | 1.10  | ( 0.65 - 1.88 )         |          |
|                                                                                            |                                            | Friday                | 1.28  | ( 0.77 - 2.13 )         |          |
|                                                                                            |                                            | Saturday              | 2.57  | ( 1.62 - 4.08 )<br>***  |          |
|                                                                                            |                                            | Sunday                | 3.96  | ( 2.56 - 6.11 )<br>***  |          |
|                                                                                            |                                            | AHS                   | 0.48  | ( 0.15 - 1.58 )         | 6,00E-12 |
|                                                                                            | Category<br>(ref :HC<br>W)                 | Hospital<br>porter    | 21.14 | ( 9.41 - 47.49 )<br>*** |          |
|                                                                                            |                                            | Logistic              | 1.55  | ( 0.33 - 7.19 )         |          |
|                                                                                            |                                            | Physician             | 5.22  | ( 1.44 - 18.89 )<br>*   |          |
|                                                                                            |                                            | Reeducati<br>on staff | 1.70  | ( 0.74 - 3.91 )         |          |
| High daily distinct CPI frequency among hospital staff<br>(mean plus three threshold)      |                                            | Monday                | 1.44  | ( 0.51 - 4.03 )         | 4.80E-14 |
|                                                                                            | days of<br>week<br>(ref:<br>Wednes<br>day) | Tuesday               | 1.39  | ( 0.47 - 4.08 )         |          |
|                                                                                            |                                            | Thursday              | 3.48  | ( 1.35 - 8.95 )<br>**   |          |
|                                                                                            |                                            | Friday                | 7.88  | ( 3.29 - 18.90 )<br>*** |          |
|                                                                                            |                                            | Saturday              | 0.38  | ( 0.04 - 3.21 )         |          |
|                                                                                            |                                            | Sunday                | 0.00  | ( 0.00 - Inf )          |          |
|                                                                                            |                                            | AHS                   | 1.06  | ( 0.55 - 2.03 )         | 0.002    |
|                                                                                            | Category<br>(ref :HC<br>W)                 | Hospital<br>porter    | 0.00  | ( 0.00 - Inf )          |          |
|                                                                                            |                                            | Logistic              | 1.94  | ( 0.72 - 5.17 )         |          |
|                                                                                            |                                            | Physician             | 0.00  | ( 0.00 - Inf )          |          |
|                                                                                            |                                            | Reeducati<br>on staff | 0.10  | ( 0.01 - 0.75 )<br>*    |          |
| High daily cumulative duration of CPIs among hospital<br>staff (mean plus three threshold) |                                            | Monday                | 1.96  | ( 0.88 - 4.37 )         | 0.00037  |
|                                                                                            | days of<br>week<br>(ref:<br>Wednes<br>day) | Tuesday               | 1.42  | ( 0.58 - 3.46 )         |          |
|                                                                                            |                                            | Thursday              | 0.94  | ( 0.35 - 2.56 )         |          |
|                                                                                            |                                            | Friday                | 2.27  | ( 1.02 - 5.03 )<br>*    |          |
|                                                                                            |                                            | Saturday              | 2.49  | ( 1.05 - 5.91 )<br>*    |          |
|                                                                                            |                                            | Sunday                | 4.48  | ( 2.06 - 9.70 )<br>***  |          |
| High daily distinct CPI frequency among patients (mean<br>plus three threshold)            | Reasons<br>for<br>hospitali                | Geriatric             | 0.85  | ( 0.19 - 3.79 )         | 0.0031   |
|                                                                                            |                                            | Neurology             | 2.05  | ( 0.95 - 4.41 )         |          |
|                                                                                            |                                            | Nutrition             | 1.35  | ( 0.60 - 3.04 )         |          |

|  |                                                            |                |       |                      |          |
|--|------------------------------------------------------------|----------------|-------|----------------------|----------|
|  | zation<br>(ref:<br>Orthopaedic)                            | Post-operative | 5.01  | ( 2.17 - 11.58 ) *** |          |
|  |                                                            | [18,30)        | 1.95  | ( 0.69 - 5.50 )      | 0.88     |
|  |                                                            | [30,40)        | 1.02  | ( 0.50 - 2.07 )      |          |
|  | Age (ref:<br>[50,60) )                                     | [40,50)        | 1.00  | ( 0.56 - 1.79 )      |          |
|  |                                                            | [60,70)        | 1.08  | ( 0.57 - 2.02 )      |          |
|  |                                                            | [70+]          | 1.24  | ( 0.61 - 2.50 )      |          |
|  | Gender<br>(ref:<br>Female)                                 | Male           | 0.98  | ( 0.64 - 1.50 )      | 0.93     |
|  |                                                            | Monday         | 1.26  | ( 0.43 - 3.65 )      | 2.50E-36 |
|  | days of<br>week<br>(ref:<br>Wednesday)                     | Tuesday        | 0.49  | ( 0.12 - 1.99 )      |          |
|  |                                                            | Thursday       | 5.36  | ( 2.22 - 12.96 ) *** |          |
|  |                                                            | Friday         | 10.52 | ( 4.51 - 24.54 ) *** |          |
|  |                                                            | Saturday       | 0.00  | ( 0.00 - Inf )       |          |
|  |                                                            | Sunday         | 0.00  | ( 0.00 - Inf )       |          |
|  | Reasons<br>for<br>hospitalization<br>(ref:<br>Orthopaedic) | Geriatric      | 7.12  | ( 0.48 - 106.35 )    | 0.014    |
|  |                                                            | Neurology      | 0.34  | ( 0.09 - 1.15 )      |          |
|  |                                                            | Nutrition      | 0.00  | ( 0.00 - 5.53e+55 )  |          |
|  |                                                            | Post-operative | 0.62  | ( 0.13 - 2.96 )      |          |
|  |                                                            | [18,30)        | 0.85  | ( 0.11 - 6.43 )      | 2.40E-06 |
|  |                                                            | [30,40)        | 3.19  | ( 1.74 - 5.84 ) ***  |          |
|  | Age (ref:<br>[50,60) )                                     | [40,50)        | 0.72  | ( 0.31 - 1.63 )      |          |
|  |                                                            | [60,70)        | 1.79  | ( 0.98 - 3.26 )      |          |
|  |                                                            | [70+]          | 0.31  | ( 0.11 - 0.82 ) *    |          |
|  | Gender<br>(ref:<br>Female)                                 | Male           | 1.50  | ( 0.99 - 2.28 )      | 0.058    |
|  |                                                            | Monday         | 2.13  | ( 0.79 - 5.68 )      | 2,00E-06 |
|  | days of<br>week<br>(ref:<br>Wednesday)                     | Tuesday        | 1.99  | ( 0.73 - 5.39 )      |          |
|  |                                                            | Thursday       | 1.78  | ( 0.65 - 4.91 )      |          |
|  |                                                            | Friday         | 2.32  | ( 0.88 - 6.12 )      |          |
|  |                                                            | Saturday       | 4.72  | ( 1.92 - 11.60 ) *** |          |
|  |                                                            | Sunday         | 6.46  | ( 2.69 - 15.46 ) *** |          |

High daily cumulative duration of CPIs among patients  
(mean plus three threshold)

*Note: Observed level of the Wald test for each parameter: \* <0.05, \*\* <0.01, \*\*\* <0.001. OR: odds ratio.*

107 **Supplementary Table S4: Factors associated with high daily contact frequency and high daily**  
 108 **cumulative duration with HCW, Physician, Reeducation staff or Hospital porter among patients,**  
 109 **resulting from a mixed model with ward-specific random intercepts to account for within-ward**  
 110 **and between-ward variations.**

111

|                                                 | <i>Factor</i>                                  | <i>level</i>   | <i>OR</i> | <i>CI 95%</i>        | <i>p-value</i> |
|-------------------------------------------------|------------------------------------------------|----------------|-----------|----------------------|----------------|
| High daily distinct CPI frequency with HCW      |                                                | Geriatric      | 3.03      | ( 0.77 - 11.87 )     | 1.50E-11       |
|                                                 | Reasons for hospitalization (ref: Orthopaedic) | Neurology      | 2.37      | ( 1.64 - 3.44 ) ***  |                |
|                                                 |                                                | Nutrition      | 0.74      | ( 0.50 - 1.08 )      |                |
|                                                 |                                                | Post-operative | 4.18      | ( 2.75 - 6.36 ) ***  |                |
|                                                 |                                                | [18,30)        | 0.96      | ( 0.54 - 1.71 )      | 4.20E-10       |
|                                                 |                                                | [30,40)        | 0.75      | ( 0.58 - 0.98 ) *    |                |
|                                                 | Age (ref: [50,60) )                            | [40,50)        | 1.25      | ( 1.02 - 1.53 ) *    |                |
|                                                 |                                                | [60,70)        | 0.99      | ( 0.79 - 1.24 )      |                |
|                                                 |                                                | [70+]          | 2.00      | ( 1.58 - 2.53 ) ***  |                |
|                                                 | Gender (ref: Female)                           | Male           | 0.84      | ( 0.73 - 0.97 ) *    | 0.019          |
|                                                 | days of week (ref: Wednesday)                  | Monday         | 1.05      | ( 0.85 - 1.30 )      | 1.90E-77       |
|                                                 |                                                | Tuesday        | 0.50      | ( 0.40 - 0.64 ) ***  |                |
|                                                 |                                                | Thursday       | 0.62      | ( 0.49 - 0.78 ) ***  |                |
|                                                 |                                                | Friday         | 0.94      | ( 0.76 - 1.16 )      |                |
|                                                 |                                                | Saturday       | 0.16      | ( 0.11 - 0.22 ) ***  |                |
|                                                 |                                                | Sunday         | 0.16      | ( 0.12 - 0.22 ) ***  |                |
|                                                 |                                                | Geriatric      | 14.42     | ( 3.33 - 62.48 ) *** | 2,00E-12       |
| High daily cumulative duration of CPIs with HCW | Reasons for hospitalization (ref: Orthopaedic) | Neurology      | 3.42      | ( 1.83 - 6.40 ) ***  |                |
|                                                 |                                                | Nutrition      | 5.64      | ( 2.55 - 12.45 ) *** |                |
|                                                 |                                                | Post-operative | 6.46      | ( 3.43 - 12.16 ) *** |                |

|  |                                                |                |      |                      |          |
|--|------------------------------------------------|----------------|------|----------------------|----------|
|  |                                                | [18,30)        | 0.08 | ( 0.01 - 0.60 ) *    | 1.30E-22 |
|  |                                                | [30,40)        | 0.02 | ( 0.002 - 0.11 ) *** |          |
|  | Age (ref: [50,60) )                            | [40,50)        | 1.12 | ( 0.83 - 1.52 )      |          |
|  |                                                | [60,70)        | 0.53 | ( 0.36 - 0.78 ) **   |          |
|  |                                                | [70+]          | 0.53 | ( 0.34 - 0.80 ) **   |          |
|  | Gender (ref: Female)                           | Male           | 0.78 | ( 0.62 - 0.97 ) *    | 0.029    |
|  |                                                | Monday         | 1.27 | ( 0.89 - 1.84 )      | 0.029    |
|  |                                                | Tuesday        | 1.19 | ( 0.82 - 1.74 )      |          |
|  | days of week (ref: Wednesday)                  | Thursday       | 0.96 | ( 0.64 - 1.42 )      |          |
|  |                                                | Friday         | 0.98 | ( 0.66 - 1.45 )      |          |
|  |                                                | Saturday       | 0.94 | ( 0.63 - 1.41 )      |          |
|  |                                                | Sunday         | 1.61 | ( 1.13 - 2.30 ) **   |          |
|  |                                                | Geriatric      | 2.05 | ( 0.75 - 5.62 )      | 0.045    |
|  | Reasons for hospitalization (ref: Orthopaedic) | Neurology      | 1.18 | ( 0.89 - 1.56 )      |          |
|  |                                                | Nutrition      | 0.63 | ( 0.43 - 0.91 ) *    |          |
|  |                                                | Post-operative | 1.12 | ( 0.80 - 1.55 )      |          |
|  |                                                | [18,30)        | 1.26 | ( 0.81 - 1.97 )      | 0.00068  |
|  |                                                | [30,40)        | 0.97 | ( 0.72 - 1.30 )      |          |
|  | Age (ref: [50,60) )                            | [40,50)        | 1.14 | ( 0.88 - 1.48 )      |          |
|  |                                                | [60,70)        | 1.27 | ( 0.97 - 1.65 )      |          |
|  |                                                | [70+]          | 1.82 | ( 1.39 - 2.39 ) ***  |          |
|  | Gender (ref: Female)                           | Male           | 0.73 | ( 0.62 - 0.86 ) ***  | 0.00012  |
|  |                                                | Monday         | 1.91 | ( 1.47 - 2.47 ) ***  | 2.90E-71 |
|  | days of week (ref: Wednesday)                  | Tuesday        | 1.28 | ( 0.97 - 1.68 )      |          |
|  |                                                | Thursday       | 2.12 | ( 1.63 - 2.74 ) ***  |          |

|  |                                                |                |      |                        |          |
|--|------------------------------------------------|----------------|------|------------------------|----------|
|  |                                                | Friday         | 1.92 | ( 1.49 -<br>2.49 ) *** |          |
|  |                                                | Saturday       | 0.31 | ( 0.21 -<br>0.46 ) *** |          |
|  |                                                | Sunday         | 0.20 | ( 0.13 -<br>0.31 ) *** |          |
|  |                                                | Geriatric      | 0.60 | ( 0.07 -<br>4.74 )     | 0.42     |
|  | Reasons for hospitalization (ref: Orthopaedic) | Neurology      | 1.78 | ( 0.75 -<br>4.20 )     |          |
|  |                                                | Nutrition      | 0.78 | ( 0.24 -<br>2.53 )     |          |
|  |                                                | Post-operative | 1.78 | ( 0.79 -<br>3.98 )     |          |
|  |                                                | [18,30)        | 0.51 | ( 0.06 -<br>3.93 )     | 2.60E-05 |
|  |                                                | [30,40)        | 0.31 | ( 0.07 -<br>1.34 )     |          |
|  | Age (ref: [50,60) )                            | [40,50)        | 2.05 | ( 1.04 -<br>4.03 ) *   |          |
|  |                                                | [60,70)        | 0.95 | ( 0.36 -<br>2.47 )     |          |
|  |                                                | [70+]          | 4.48 | ( 2.16 -<br>9.27 ) *** |          |
|  | Gender (ref: Female)                           | Male           | 1.36 | ( 0.79 -<br>2.34 )     | 0.28     |
|  |                                                | Monday         | 0.78 | ( 0.28 -<br>2.14 )     | 2.40E-05 |
|  |                                                | Tuesday        | 1.09 | ( 0.42 -<br>2.82 )     |          |
|  | days of week (ref: Wednesday)                  | Thursday       | 1.74 | ( 0.73 -<br>4.21 )     |          |
|  |                                                | Friday         | 3.12 | ( 1.41 -<br>6.89 ) **  |          |
|  |                                                | Saturday       | 0.61 | ( 0.20 -<br>1.84 )     |          |
|  |                                                | Sunday         | 0.33 | ( 0.09 -<br>1.24 )     |          |
|  |                                                | Geriatric      | 0.49 | ( 0.35 -<br>0.67 ) *** | 2.80E-06 |
|  | Reasons for hospitalization (ref: Orthopaedic) | Neurology      | 0.72 | ( 0.59 -<br>0.89 ) **  |          |
|  |                                                | Nutrition      | 1.19 | ( 0.93 -<br>1.53 )     |          |
|  |                                                | Post-operative | 0.37 | ( 0.23 -<br>0.59 ) *** |          |
|  | Age (ref: [50,60) )                            | [18,30)        | 1.42 | ( 0.92 -<br>2.19 )     | 0.0052   |
|  |                                                | [30,40)        | 1.22 | ( 0.95 -<br>1.55 )     |          |

|  |                                                |                      |                          |                      |      |
|--|------------------------------------------------|----------------------|--------------------------|----------------------|------|
|  | [40,50)                                        | 0.77                 | ( 0.60 - 0.98 ) *        |                      |      |
|  | [60,70)                                        | 1.05                 | ( 0.83 - 1.31 )          |                      |      |
|  | [70+]                                          | 0.81                 | ( 0.62 - 1.06 )          |                      |      |
|  | Gender (ref: Female)                           | Male                 | 0.82 ( 0.71 - 0.96 ) *   | 0.015                |      |
|  |                                                | Monday               | 1.20 ( 0.94 - 1.52 )     | 1.40E-140            |      |
|  |                                                | Tuesday              | 1.19 ( 0.93 - 1.52 )     |                      |      |
|  |                                                | Thursday             | 1.37 ( 1.07 - 1.74 ) *   |                      |      |
|  | days of week (ref: Wednesday)                  | Friday               | 1.75 ( 1.39 - 2.20 ) *** |                      |      |
|  |                                                | Saturday             | 0.00 ( 0.00 - 4.63e+67 ) |                      |      |
|  |                                                | Sunday               | 0.00 ( 0.00 - 2.79e+59 ) |                      |      |
|  |                                                | Geriatric            | 1.35 ( 0.83 - 2.19 )     | 7,00E-04             |      |
|  | Reasons for hospitalization (ref: Orthopaedic) | Neurology            | 0.72 ( 0.51 - 1.02 )     |                      |      |
|  |                                                | Nutrition            | 1.64 ( 1.09 - 2.45 ) *   |                      |      |
|  |                                                | Post-operative       | 0.82 ( 0.45 - 1.50 )     |                      |      |
|  |                                                | [18,30)              | 0.38 ( 0.14 - 1.05 )     | 0.01                 |      |
|  |                                                | [30,40)              | 0.58 ( 0.37 - 0.90 ) *   |                      |      |
|  | Age (ref: [50,60) )                            | [40,50)              | 0.58 ( 0.40 - 0.86 ) **  |                      |      |
|  |                                                | [60,70)              | 0.61 ( 0.42 - 0.89 ) *   |                      |      |
|  |                                                | [70+]                | 0.65 ( 0.42 - 1.01 )     |                      |      |
|  |                                                | Gender (ref: Female) | Male                     | 1.10 ( 0.87 - 1.39 ) | 0.44 |
|  |                                                | Monday               | 1.63 ( 1.12 - 2.38 ) *   | 1.80E-47             |      |
|  |                                                | Tuesday              | 1.43 ( 0.96 - 2.11 )     |                      |      |
|  | days of week (ref: Wednesday)                  | Thursday             | 1.47 ( 1.00 - 2.17 )     |                      |      |
|  |                                                | Friday               | 1.83 ( 1.26 - 2.66 ) **  |                      |      |

High daily cumulative duration of CPIs with reeducation staff

|  |                                                         |                    |      |                            |               |
|--|---------------------------------------------------------|--------------------|------|----------------------------|---------------|
|  |                                                         | Sunday             | 0.00 | ( 0.00 -<br>7.57e+146<br>) |               |
|  |                                                         | Saturday           | 0.00 | ( 0.00 -<br>4.31e+88<br>)  |               |
|  |                                                         | Geriatric          | 0.33 | ( 0.16 -<br>0.68 ) **      | 3.10E-<br>10  |
|  | Reasons for<br>hospitalization<br>(ref:<br>Orthopaedic) | Neurology          | 0.70 | ( 0.54 -<br>0.92 ) **      |               |
|  |                                                         | Nutrition          | 0.58 | ( 0.43 -<br>0.78 ) ***     |               |
|  |                                                         | Post-<br>operative | 0.37 | ( 0.26 -<br>0.52 ) ***     |               |
|  |                                                         | [18,30)            | 0.94 | ( 0.62 -<br>1.40 )         | 0.71          |
|  |                                                         | [30,40)            | 1.18 | ( 0.95 -<br>1.46 )         |               |
|  | Age (ref:<br>[50,60) )                                  | [40,50)            | 1.07 | ( 0.88 -<br>1.29 )         |               |
|  |                                                         | [60,70)            | 1.01 | ( 0.83 -<br>1.23 )         |               |
|  |                                                         | [70+]              | 1.03 | ( 0.82 -<br>1.29 )         |               |
|  | Gender (ref:<br>Female)                                 | Male               | 0.78 | ( 0.69 -<br>0.89 ) ***     | 0.00026       |
|  |                                                         | Monday             | 1.09 | ( 0.90 -<br>1.32 )         | 1.60E-<br>265 |
|  |                                                         | Tuesday            | 1.06 | ( 0.87 -<br>1.29 )         |               |
|  | days of week<br>(ref:<br>Wednesday)                     | Thursday           | 1.11 | ( 0.91 -<br>1.35 )         |               |
|  |                                                         | Friday             | 1.28 | ( 1.05 -<br>1.55 ) *       |               |
|  |                                                         | Saturday           | 0.00 | ( 0.00 -<br>4.11e+39<br>)  |               |
|  |                                                         | Sunday             | 0.00 | ( 0.00 -<br>0.94 ) *       |               |
|  |                                                         | Geriatric          | 0.30 | ( 0.18 -<br>0.49 ) ***     | 0.009         |
|  | Reasons for<br>hospitalization<br>(ref:<br>Orthopaedic) | Neurology          | 0.82 | ( 0.59 -<br>1.13 )         |               |
|  |                                                         | Nutrition          | 1.13 | ( 0.76 -<br>1.66 )         |               |
|  |                                                         | Post-<br>operative | 0.79 | ( 0.43 -<br>1.46 )         |               |
|  | Age (ref:<br>[50,60) )                                  | [18,30)            | 0.63 | ( 0.25 -<br>1.60 )         | 0.008         |

High daily distinct CPI frequency with  
hospital porter

High daily cumulative duration of CPIs  
with hospital porter



|                                     |          |      |                        |              |
|-------------------------------------|----------|------|------------------------|--------------|
|                                     | [30,40)  | 1.12 | ( 0.73 -<br>1.70 )     |              |
|                                     | [40,50)  | 1.62 | ( 1.15 -<br>2.30 ) **  |              |
|                                     | [60,70)  | 1.09 | ( 0.74 -<br>1.59 )     |              |
|                                     | [70+]    | 1.70 | ( 1.16 -<br>2.50 ) **  |              |
| Gender (ref:<br>Female)             | Male     | 0.62 | ( 0.48 -<br>0.79 ) *** | 0.00013      |
|                                     | Monday   | 0.92 | ( 0.62 -<br>1.38 )     | 9.20E-<br>49 |
|                                     | Tuesday  | 1.11 | ( 0.75 -<br>1.64 )     |              |
| days of week<br>(ref:<br>Wednesday) | Thursday | 1.27 | ( 0.87 -<br>1.85 )     |              |
|                                     | Friday   | 1.9  | ( 1.34 -<br>2.70 ) *** |              |
|                                     | Saturday | 0.00 | ( 0.00 -<br>Inf )      |              |
|                                     | Sunday   | 0.00 | ( 0.00 -<br>Inf )      |              |

*Note: Observed level of the Wald test for each parameter: \* <0.05, \*\* <0.01, \*\*\* <0.001. OR: odds ratio.*

112

113 **Supplementary Figure S1: Time trends in CPIs over a 24-hour day for each day of the week**  
 114 **during the whole study period. Boxplot of the distribution of hourly CPI**

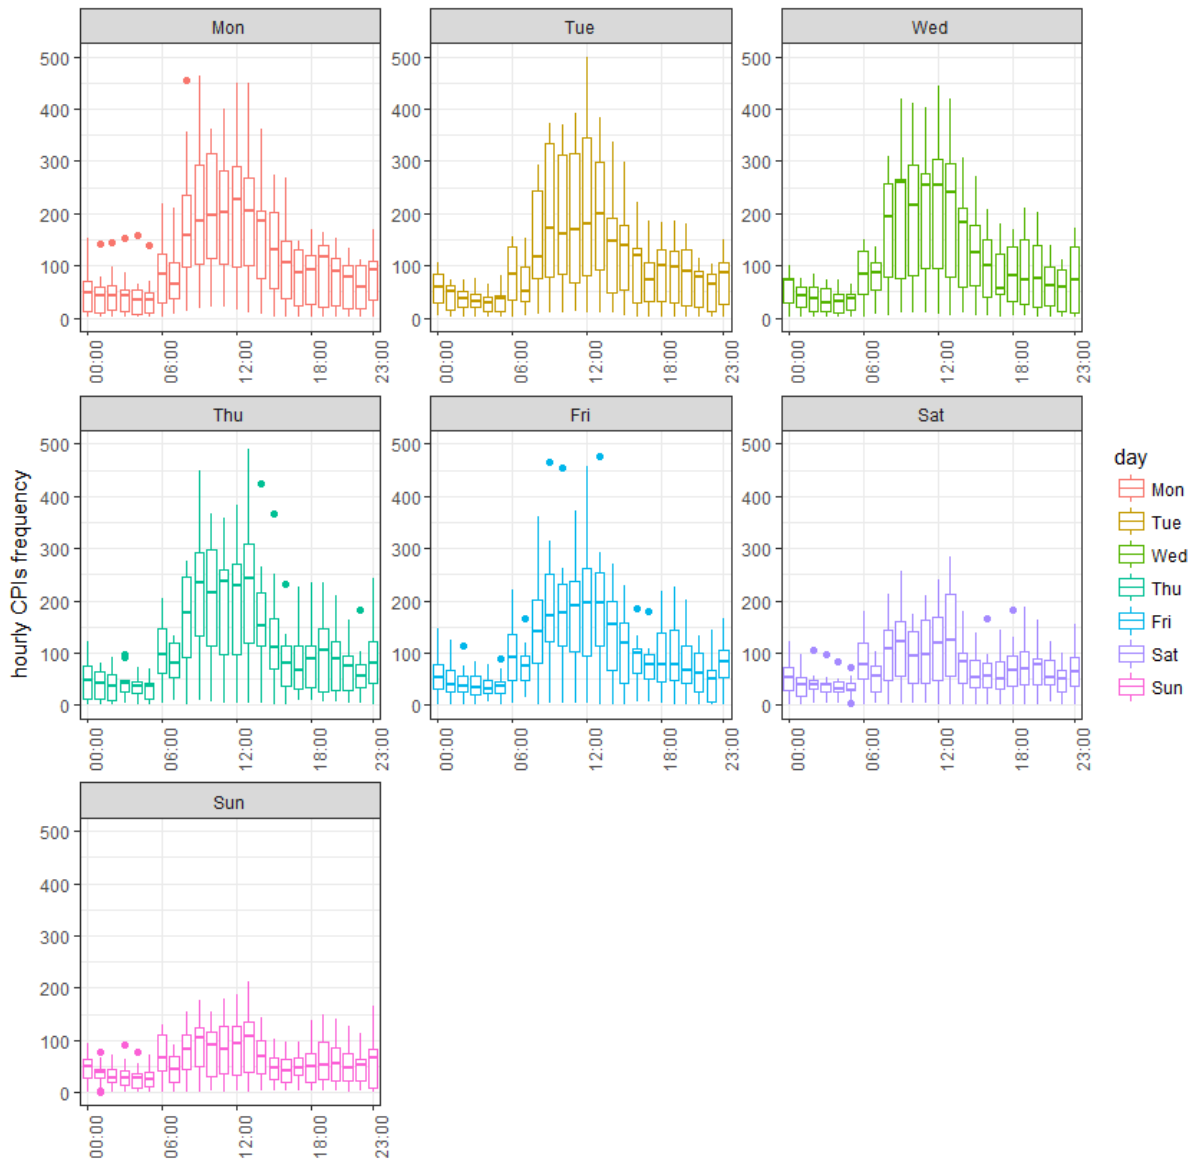

115

116

117
